# Supplementary material for: A tunable fluorescent probe for superoxide anion detection during inflammation caused byTreponema pallidum
Source: Royal Society of Chemistry journal article supplement (doi:10.1039/d3tb00747b), 2023-01-01
Supplement: d3tb00747b1.pdf [file d3tb00747b1.pdf]

## **A tunable fluorescence probe for superoxide anion detection during inflammation caused by *Treponema pallidum***

Weiqliang Lin<sup>a,†</sup>, Jialin Huang<sup>a,†</sup>, Shuang Guo<sup>a,†</sup>, Meijiao Zhao<sup>a</sup>, Xu Chen<sup>c</sup>, Qiuping  
Shang<sup>a</sup>, Ruoyuan Zhang<sup>a</sup>, Guangfu Liao<sup>b,\*</sup>, Judun Zheng<sup>a,\*</sup>, Yuhui Liao<sup>a,d,\*</sup>

<sup>a</sup> Molecular Diagnosis and Treatment Center for Infectious Diseases, Dermatology Hospital, Southern Medical University, Guangzhou, 510091, P. R. China

<sup>b</sup> College of Material Engineering, Fujian Agriculture and Forestry University, Fuzhou, 350002, P. R. China

<sup>c</sup> Department of Infectious Disease, the Fifth Affiliated Hospital, Sun Yat-sen University, Zhuhai, 519000, P. R. China

<sup>d</sup> NHC Key Laboratory of Metabolic Cardiovascular Diseases Research, Ningxia Key Laboratory of Vascular Injury and Repair Research, Ningxia Medical University, Yinchuan, 750004, P. R. China

† Electronic Supplementary Information (ESI) available.

‡ These authors contributed equally.

\*Correspondence Authors

**Yuhui Liao:** E-mail: liaoyh8@mail.sysu.edu.cn

**Judun Zheng:** E-mail: zhengjd53815@163.com

**Guangfu Liao:** E-mail: liaogf@mail2.sysu.edu.cn

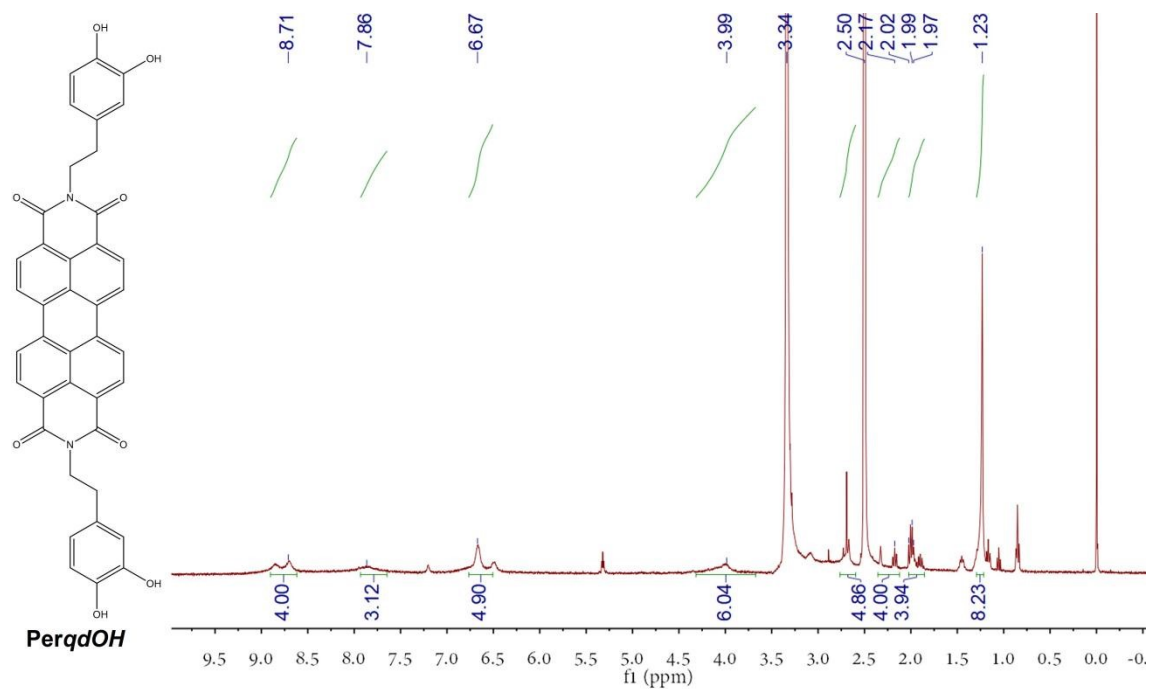

**Figure S1.**  $^1\text{H}$ NMR of **PerqdOH**.  $^1\text{H}$  NMR (400 MHz,  $\text{DMSO-}d_6$ )  $\delta$  8.71 (s, 4H), 7.86 (s, 3H), 6.67 (s, 5H), 3.99 (s, 6H), 2.76 – 2.59 (m, 5H), 2.17 (s, 4H), 1.98 (d,  $J = 6.6$  Hz, 4H), 1.23 (s, 8H).

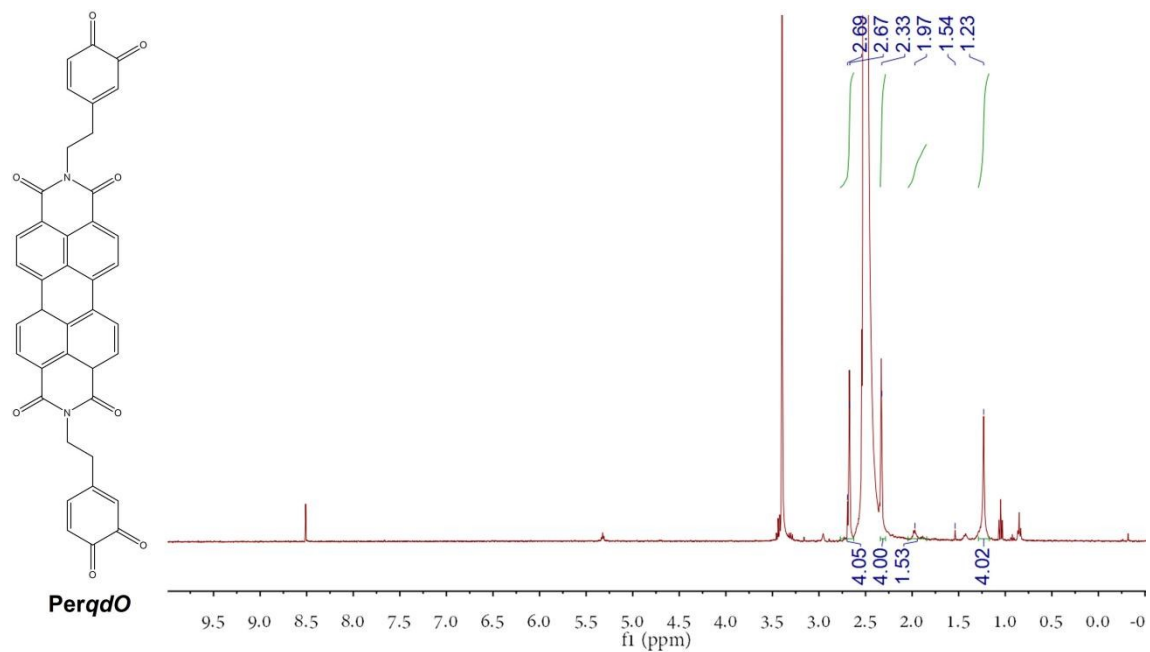

**Figure S2.**  $^1\text{H}$ NMR of **PerqdO**.  $^1\text{H}$  NMR (400 MHz,  $\text{DMSO-}d_6$ )  $\delta$  2.68 (d,  $J = 9.6$  Hz, 4H), 2.33 (s, 4H), 1.97 (s, 2H), 1.23 (s, 4H).

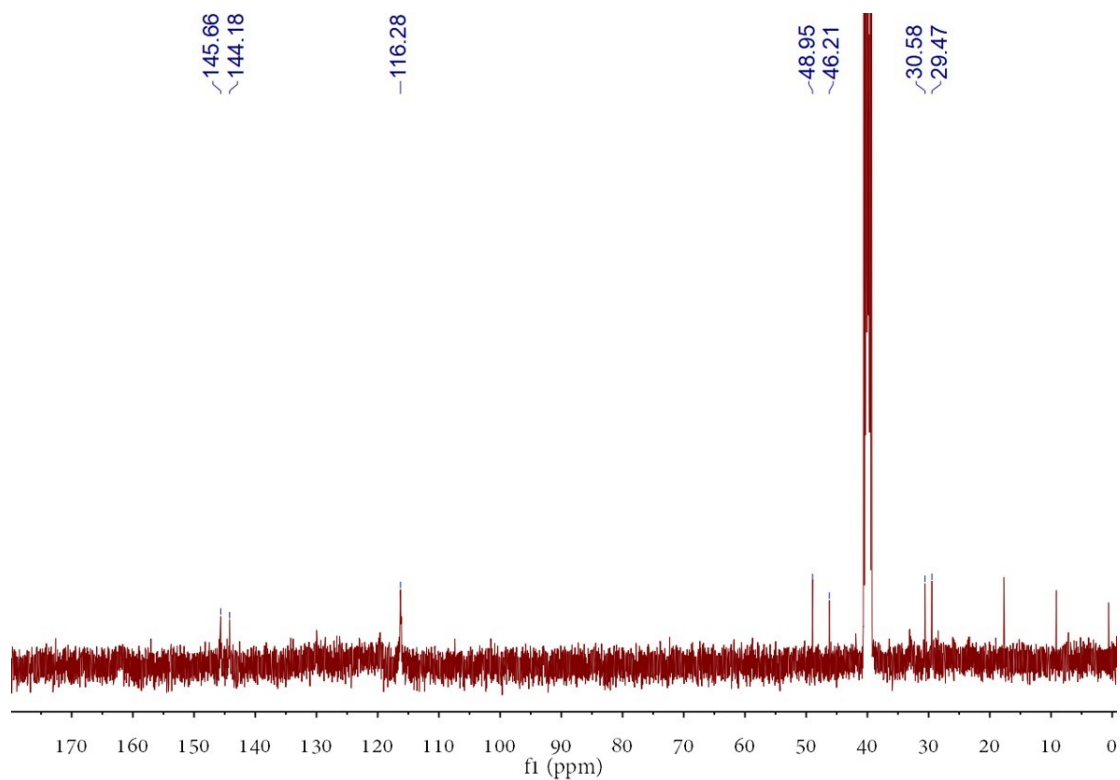

**Figure S3.** <sup>13</sup>CNMR of *PerqdOH*. <sup>13</sup>C NMR (101 MHz, DMSO-*d*<sub>6</sub>) δ 145.66, 144.18, 116.28, 48.95, 46.21, 30.58, 29.47.

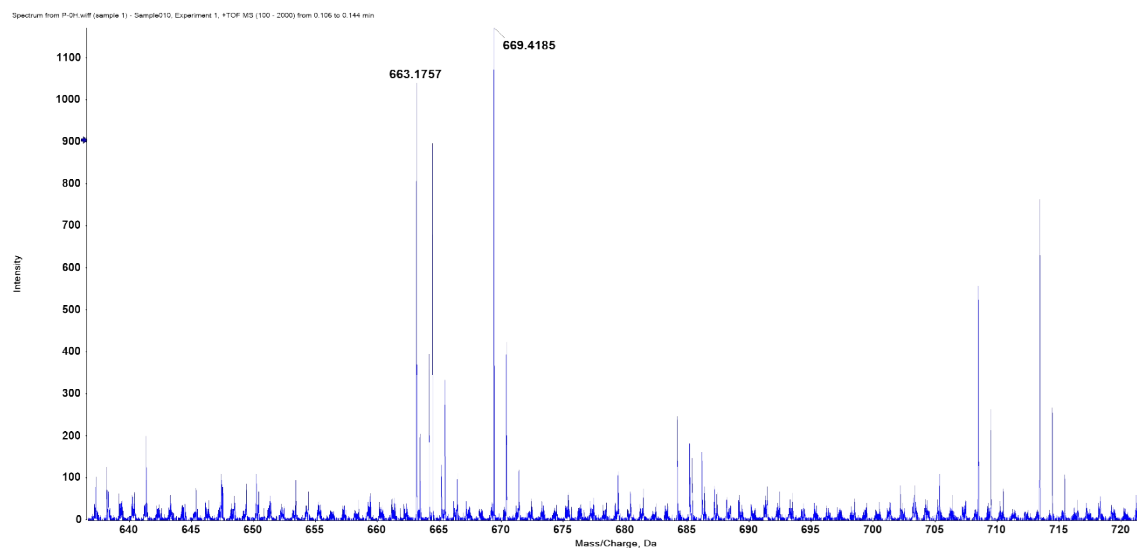

**Figure S4.** HR-MS of *PerqdOH*.

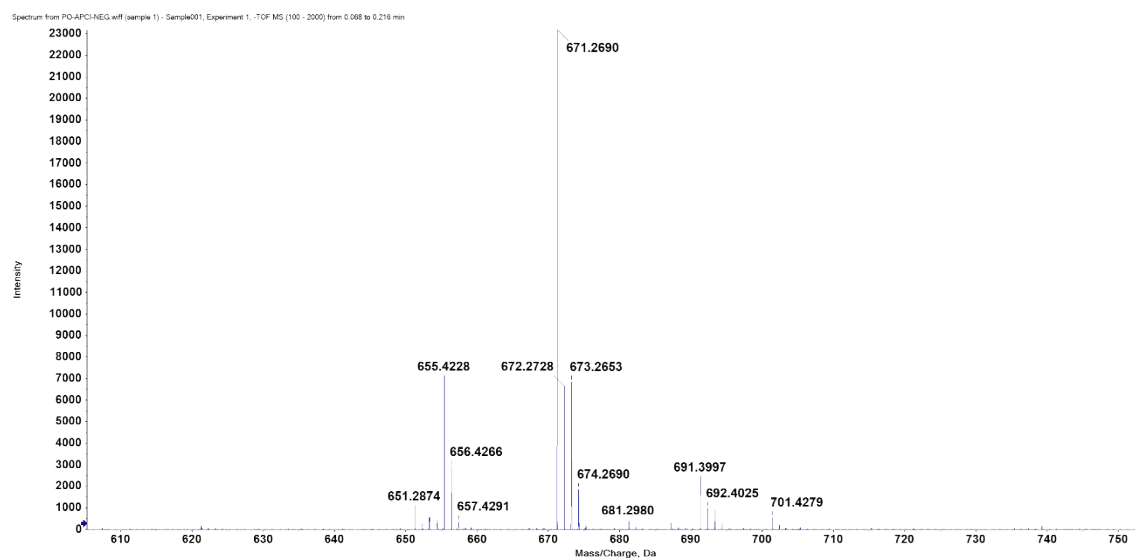

**Figure S5.** HR-MS of *PerqdO*.

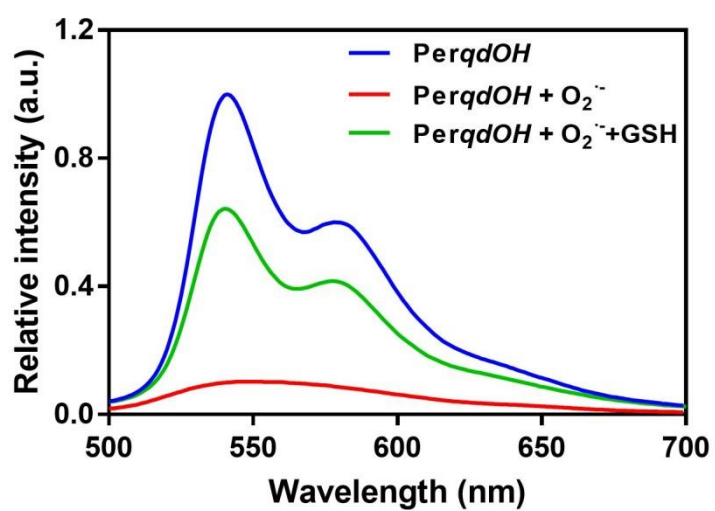

**Figure S6.** The fluorescence spectra change (Ex=490 nm) of *PerqdOH* after adding O<sub>2</sub><sup>-</sup> and GSH.

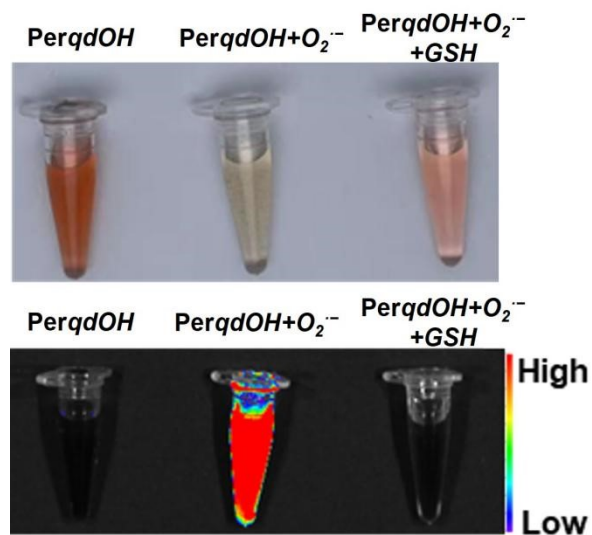

**Figure S7.** Images of *PerqdOH* after adding  $O_2^-$  and GSH under natural light and the condition of excitation of 680 nm and emission of 750 nm.

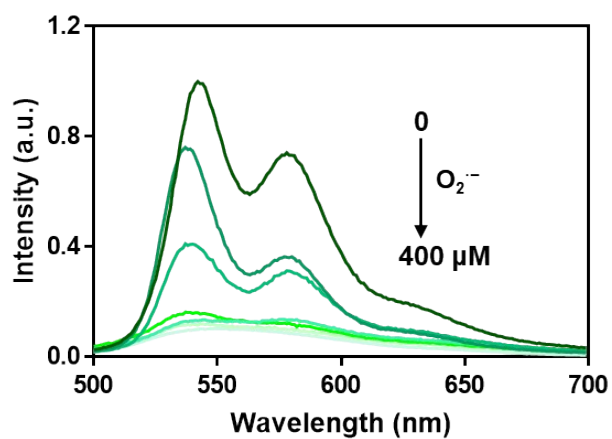

**Figure S8.** The fluorescence spectra change (Ex=490 nm) of *PerqdOH* after adding different concentrations of  $O_2^-$  (0-400  $\mu$ M).

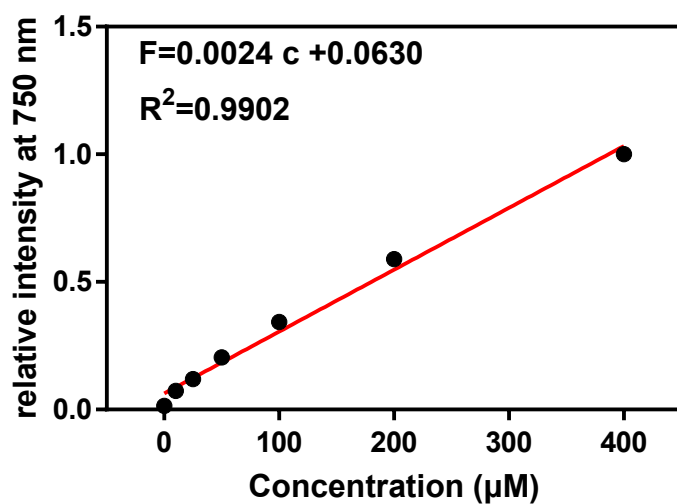

**Figure S9.** The linear fitting curve of the relative fluorescence intensity at 750 nm.

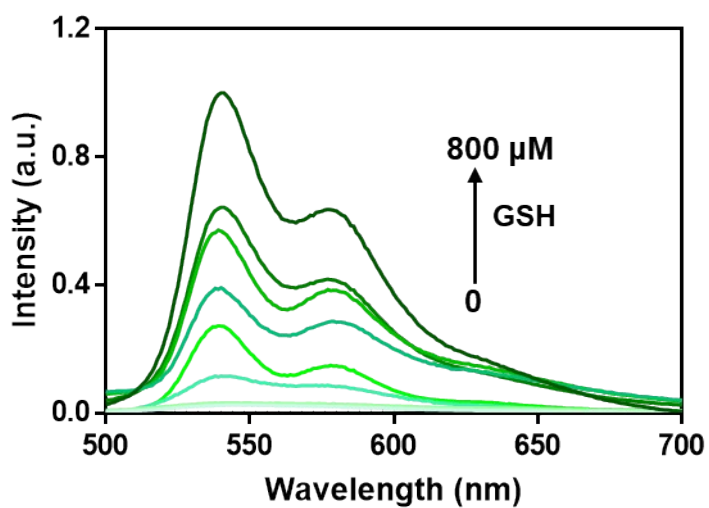

**Figure S10.** The fluorescence spectra change (Ex=490 nm) of *PerqDOH* after adding different concentrations of GSH (0-800 µM).

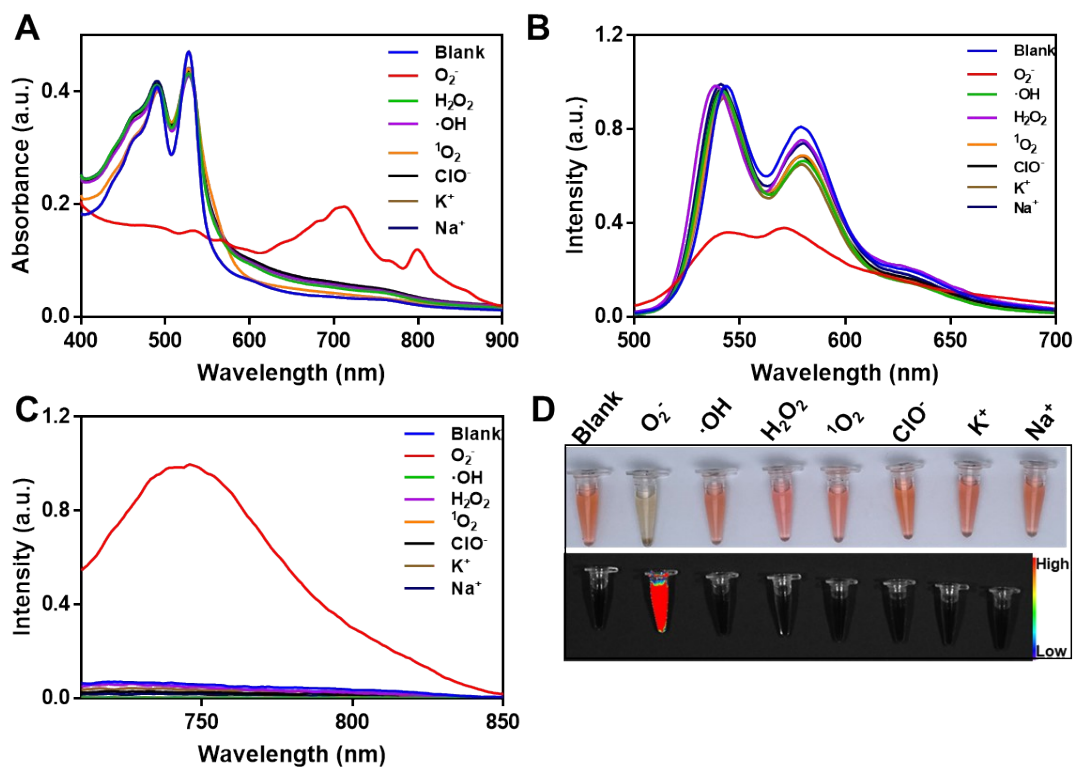

**Figure S11.** The selectivity of *PerqDOH* towards different ROS including  $O_2^-$ ,  $\cdot OH$ ,  $H_2O_2$ ,  $^1O_2$ ,  $ClO^-$  and so on. **A)** UV-vis spectra. Fluorescence spectra with excitation of **B)** 490 nm and **C)** 700 nm. **D)** Images of *PerqDOH* within different ROS.

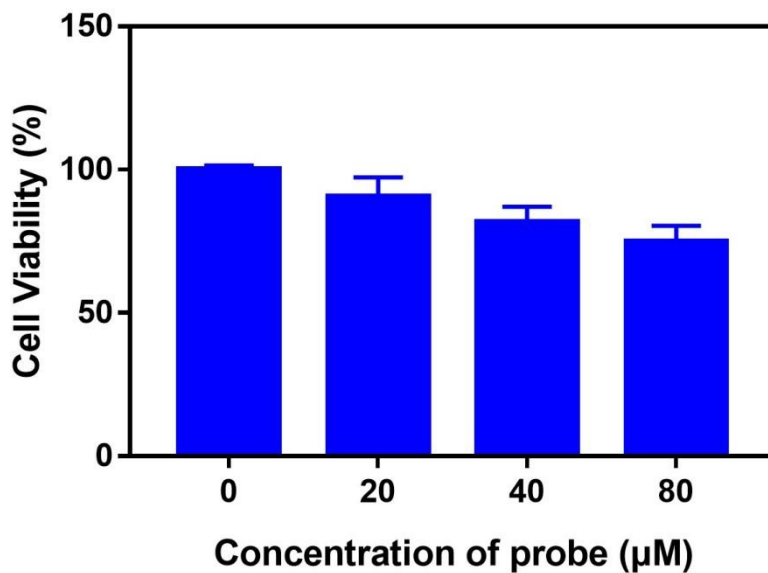

**Figure S12.** Cell viability under different concentration of *PerqDOH*.

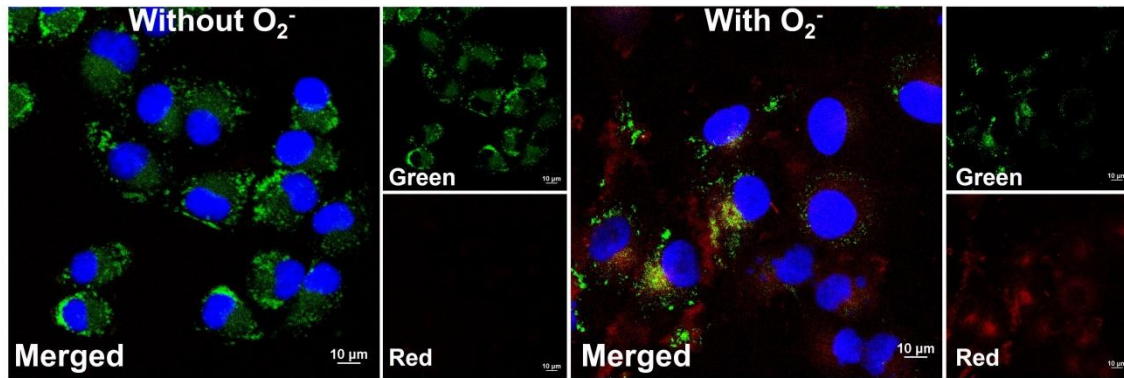

**Figure S13.** Fluorescence images of cell lines within and without  $O_2^-$ .

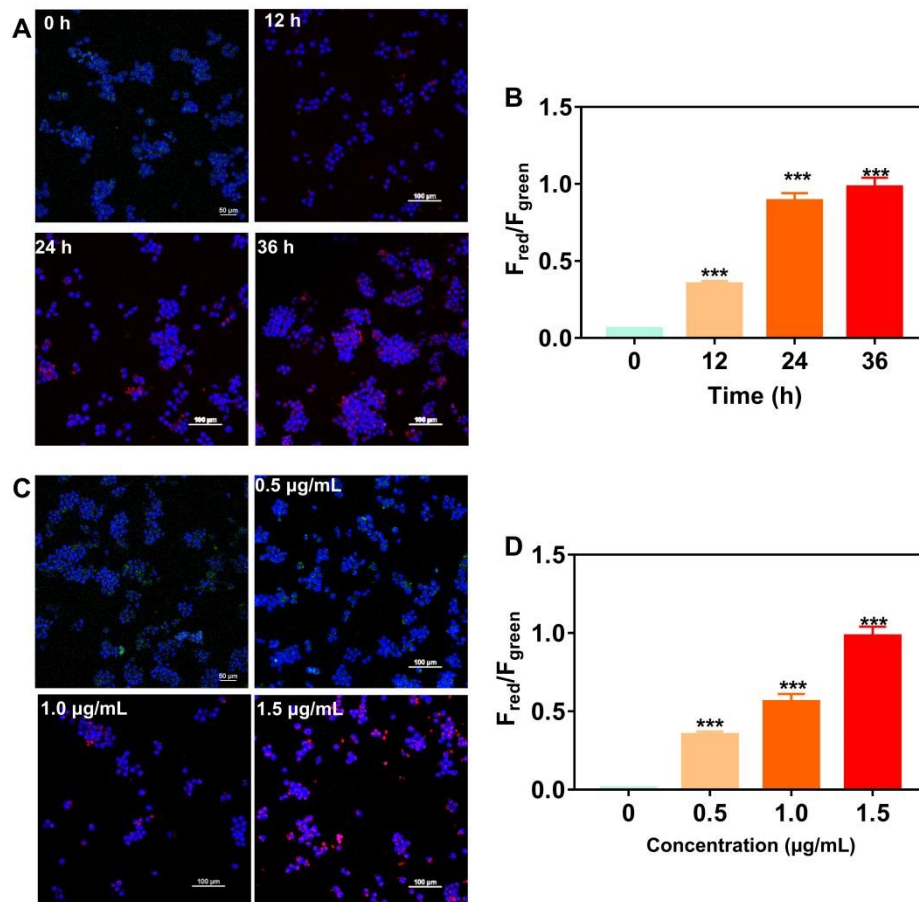

**Figure S14.** Monitoring endogenous  $O_2^-$  in the cells. Fluorescent images of RAW 264.7 cells after co-incubating with PMA in **A**) time-dependent manner (from 0 h to 36 h) and **B**) dose-dependent manner (0-1.5  $\mu\text{g/mL}$ ). **C**) and **D**) were the quantitative analysis of the relative fluorescence intensity.



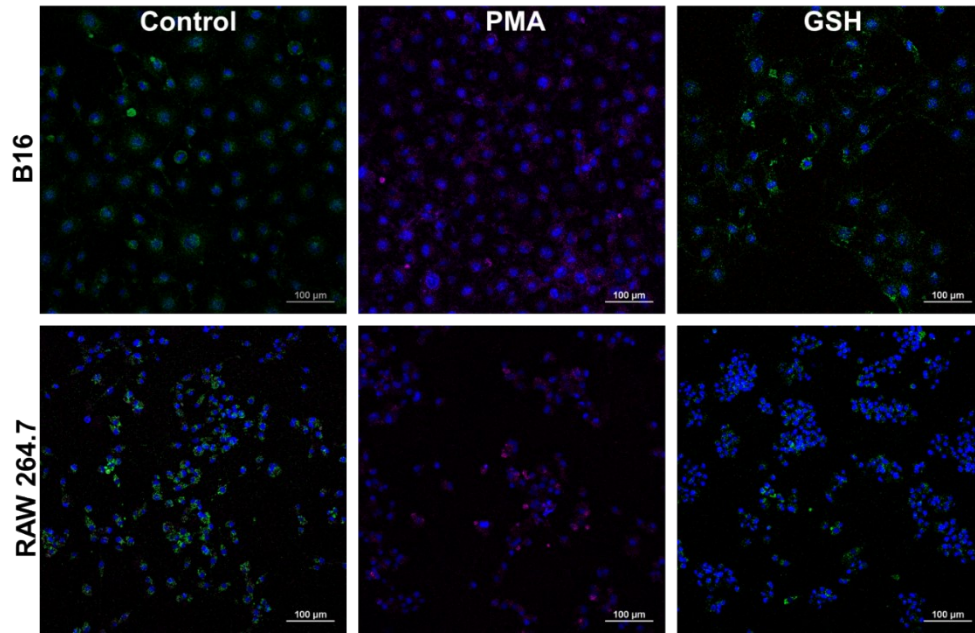

**Figure S15.** Fluorescence images of B16 and RAW 264.7 cell lines with the addition of PMA after pre-treating with *PerqdOH*, and the GSH was added 24 hours after the PMA was co-cultured.

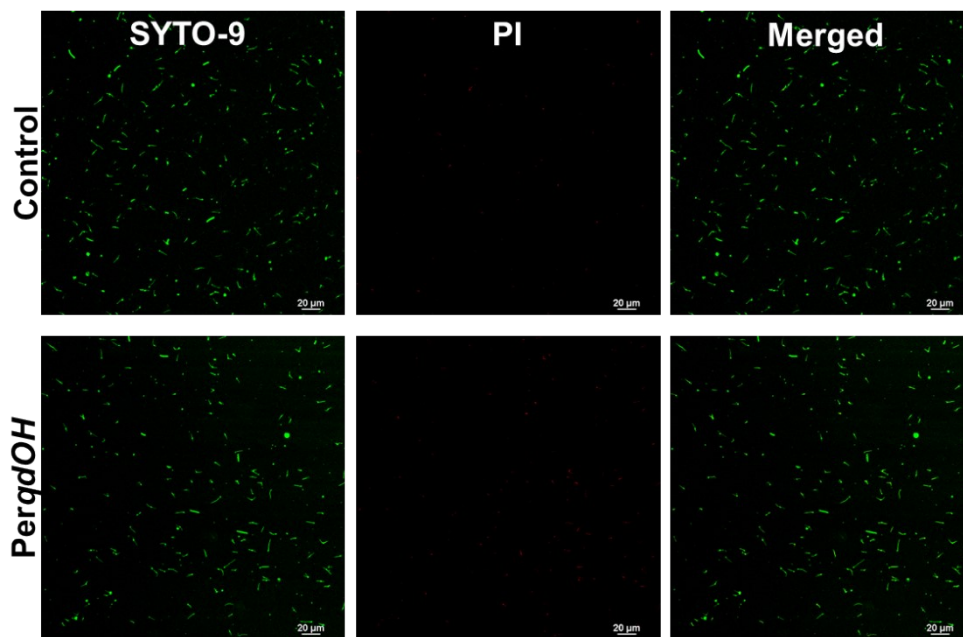

**Figure S16.** Toxicity evaluation of *PerqdOH* (40 μM) to the *T. pallidum*.
